# Brain Injury in Very Preterm Children and Neurosensory and Cognitive Disabilities during Childhood: The EIPAGE Cohort Study

Stéphane Marret<sup>1\*</sup>, Laetitia Marchand-Martin<sup>2</sup>, Jean-Charles Picaud<sup>3</sup>, Jean-Michel Hascoët<sup>4</sup>, Catherine Arnaud<sup>5</sup>, Jean-Christophe Rozé<sup>7</sup>, Patrick Truffert<sup>6</sup>, Béatrice Larroque<sup>8</sup>, Monique Kaminski<sup>2</sup>, Pierre-Yves Ancel<sup>2</sup>, for the EIPAGE Study Group<sup>1</sup>

**1** Department of Neonatal Medicine, Rouen University Hospital and Region-INSERM Team, ERI 28, NeoVasc, Institute for Biomedical Research and Innovation, Rouen University, Rouen, France, **2** INSERM, UMR S953, Epidemiological Research Unit on Perinatal Health and Women's and Children's Health, Hôpital Tenon, Paris, France; UPMC Univ Paris 06, UMR S 953, Paris, France, **3** Department of Neonatology, Hôpital de la Croix Rousse, Hospices Civils, Lyon, France, **4** Neonatal Department, Maternité Régionale, Nancy, France, **5** INSERM UMR U558, Research Unit on Perinatal Epidemiology, Child Health and Development, University Toulouse III Paul Sabatier, Toulouse, France, **6** Department of Neonatal Medicine, Hôpital Jeanne-de-Flandres, Lille, France, **7** Department of Neonatal Medicine, Nantes University Hospital, Nantes, France, **8** INSERM, UMR S953, Epidemiological Research Unit on Perinatal Health and Women's and Children's Health, Hôpital Tenon, Paris, France; UPMC Univ Paris 06, Paris, France

## Abstract

**Objective:** To investigate the association of motor and cognitive/learning deficiencies and overall disabilities in very preterm (VPT) children and their relations to gestational age (GA) and brain lesions.

**Design, Setting, and Participants:** EIPAGE is a longitudinal population-based cohort study of children born before 33 weeks' gestation (WG) in 9 French regions in 1997–1998. Cumulating data from all follow up stages, neurodevelopmental outcomes were available for 90% of the 2480 VPT survivors at 8 years. Main outcomes were association of motor and cognitive deficiencies and existence of at least one deficiency (motor, cognitive, behavioral/psychiatric, epileptic, visual, and/or hearing deficiencies) in three GA groups (24–26, 27–28, and 29–32WG) and four groups of brain lesions (none, minor, moderate, or severe).

**Results:** VPT had high rates of motor (14%) and cognitive (31%) deficiencies. Only 6% had an isolated motor deficiency, 23% an isolated cognitive one and 8% both types. This rate reached 20% among extremely preterm. Psychiatric disorders and epilepsy were observed in 6% and 2% of children, respectively. The risks of at least one severe or moderate deficiency were 11 and 29%. These risks increased as GA decreased; only 36% of children born extremely preterm had no reported deficiency. Among children with major white matter injury (WMI), deficiency rates reached 71% at 24–26WG, 88% at 27–28WG, and 80% at 29–32WG; more than 40% had associated motor and cognitive deficiencies. By contrast, isolated cognitive deficiency was the most frequent problem among children without major lesions.

**Conclusions:** In VPT, the lower the GA, the higher the neurodisability rate. Cerebral palsy is common. Impaired cognitive development is more frequent. Its occurrence in case without WMI or early motor disorders makes long-term follow up necessary. The strong association between motor impairments, when they exist, and later cognitive dysfunction supports the hypothesis of a common origin of these difficulties.

**Citation:** Marret S, Marchand-Martin L, Picaud J-C, Hascoët J-M, Arnaud C, et al. (2013) Brain Injury in Very Preterm Children and Neurosensory and Cognitive Disabilities during Childhood: The EIPAGE Cohort Study. PLoS ONE 8(5): e62683. doi:10.1371/journal.pone.0062683

**Editor:** Kai Wang, Anhui Medical University, China

**Received:** January 3, 2013; **Accepted:** March 24, 2013; **Published:** May 2, 2013

**Copyright:** © 2013 Marret et al. This is an open-access article distributed under the terms of the Creative Commons Attribution License, which permits unrestricted use, distribution, and reproduction in any medium, provided the original author and source are credited.

**Funding:** The EIPAGE study was supported by grants from INSERM (National Institute of Health and Medical Research), the Directorate General for Health at the Ministry for Social Affairs, Merck-Sharp and Dohme-Chibret, the Medical Research Foundation, and "Hospital Program for Clinical Research 2001 n°AOM01117" of the French Ministry of Health. The 8-year follow-up was supported by the "Hospital Program for Clinical Research 2004/054/HP" of the French Ministry of Health, the Wyeth Foundation for Children and Adolescents, and the FEDER "European Funds for Regional Development" of Haute-Normandie 2010–2013. The funders had no role in study design, data collection and analysis, decision to publish, or preparation of the manuscript. In particular, the commercial funder (Merck-Sharp and Dohme-Chibret) does not alter the authors' adherence to all the PLOS ONE policies on sharing data and materials.

**Competing Interests:** The authors have declared that no competing interests exist.

\* E-mail: stephane.marret@chu-rouen.fr

¶ Membership of the EIPAGE Study Group is provided in the Acknowledgments.

## Introduction

Very preterm (VPT) infants born before 33 weeks of gestation (WG) are at particularly high risk for a range of neurodevelop-

mental impairments including cerebral palsy (CP) and sensory, cognitive, and behavioral disabilities. CP is a neurodevelopmental motor condition that can be recognized from early childhood; its prevalence has decreased or at least levelled off over the last

decade [1,2,3,4]. The prevalence of cognitive and behavioral deficits, however, remains high [5,6]. Although these children can suffer from multiple difficulties, not enough is known about the associations between outcomes in different developmental domains.

Although anoxia-ischemia at birth has long been considered the predominant factor, the pathophysiology of neonatal brain injury and subsequent neurodevelopmental disorders is complex and multifactorial. White matter injury (WMI) is classically considered the most reliable prognostic indicator of CP, thought to explain the severest forms of developmental motor disorders [7,8,9]. Recent studies, however, show that neuronal/axonal disease is associated with periventricular WMI and affects the subcortical white matter, cortex, basal ganglia, brainstem, and cerebellum [9]. The interrelation between destructive and developmental disturbances is emphasized in the occurrence of sequelae and subsequent handicaps.

Our objective was to improve our understanding of the neurodevelopmental disorders of VPT children and their interplay in various domains. Therefore, we investigated motor and cognitive deficiencies, psychiatric/behavioral disorders, epilepsy, neurosensory deficits, their co-occurrence, and their associations with gestational age at birth and neonatal cranial ultrasonographic (cUS) abnormalities in a large population-based cohort of VPT infants followed through 8 years of age.

## Methods

### Population Study

The Epipage study covered all births between 22 and 32 completed WG in 1997 and all births between 22 and 26 completed WG in 1998 in 9 regions of France and, after parental consent, included all children discharged alive from the hospital. At recruitment in the maternity or neonatal unit, investigators told parents about the study, gave them written information, and obtained verbal consent. Because only 3 infants born at 23 WG survived, the study was limited to children born between 24 and 32 WG. This study is limited to survivors at 8 years of age.

In accordance with French regulations, the study and the verbal consent were approved by the Comité consultatif sur le traitement de l'information en matière de recherche dans le domaine de la santé and the Commission Nationale de l'Informatique et des Libertés (the French data protection agency). There was no ethic approval from ethics committee because it was not necessary in France for an observational study. The verbal consent was documented in each patient medical file.

### Data Collection

At recruitment, medical and social information was collected in maternity and neonatal units. The follow-up included the following stages:

- 1) At 2 years, a standard questionnaire was completed by the child's physician [10];
- 2) At 5 years, a standardized medical examination, including a short version of the Touwen neurologic examination and a developmental evaluation with the Kaufman Assessment Battery for Children (K-ABC), was conducted by trained examiners in special centers set up for the study [6,11];
- 3) At 8 years of age, parents received a mail questionnaire asking about the child's health and school situation [12]. In 5 regions, the local office for people with disabilities (Maison Départementale des Personnes Handicapées, MDPH), re-

sponsible for meeting specific needs of disabled people at all ages, completed an additional questionnaire, after searching both for children already known to have a neuromotor or sensory deficiency or learning disability or to be in a specialized center or school and for those whose parents did not return the questionnaire at 8 years. Information on deficiencies, special schooling, and special support and aids was collected for all children with a record at their local MDPH.

### Neonatal Characteristics

Gestational age refers to the number of completed weeks of amenorrhea and was studied in the following classes: 24–26, 27–28, 29–30, and 31–32 WG.

During the neonatal period, 97% of the EPIPAGE study infants had at least one cUS in the neonatal period and 66% had at least 3 [13]. Two major types of cerebral lesions were assessed: intraventricular hemorrhage (IVH) with white matter disease (intraparenchymal hemorrhage, IPH), and periventricular leukomalacia (PVL) with ventricular dilatation. Subependymal hemorrhage was classified as grade I, IVH without ventricular dilation as grade II, and IVH with ventricular dilation as grade III. IPH included a large unilateral parenchymal hyperdense area or large unilateral porencephalic cyst. PVL was defined by the presence of periventricular white-matter echolucent areas (cystic PVL) or echodense spots persisting more than 14 days without cyst formation. Ventricular dilatation was defined by an isolated dilatation of ventricles with no associated IVH. When several cerebral lesions were observed, the most severe was considered. Brain injury was classified as follows: 1) cystic PVL or IPH (major lesions), 2) persistent echodense areas or ventricular dilatation or grade III IVH (moderate lesions), 3) grade II or grade I IVH (minor lesions), 4) no identified cerebral abnormality (no lesion).

### Outcome Indicators (Table 1)

Six deficiencies or disorders were considered: motor deficiencies, cognitive deficiencies/learning disabilities, psychiatric disorders, epilepsy, visual deficiency, and hearing deficiency. To reduce bias due to loss to follow-up and to be able to classify as many children as possible, we used all available data from all stages of follow-up (2, 5, and 8 years) for each deficiency to determine if it affected the child and how severely. Severity was assessed according to the most recent information available. Moreover, when information in one domain of development was missing at one stage of follow up, the child was considered free from this deficiency at that stage.

Two combined indicators were considered. The first describes any combination of motor and cognitive deficiencies, regardless of other deficiencies or disorders. The second assesses the presence of at least one severe deficiency versus at least one moderate deficiency versus none, again regardless of the deficiency or disorder. Table 1 summarizes all deficiency indicators and their definitions.

### Statistical Analysis

Results are presented as proportions of the number of survivors included in the follow-up after discharge from neonatal care. Deficiencies and their grouping were reported according to gestational age and categories of neonatal brain injuries diagnosed by ultrasonographic studies. We used the  $\chi^2$  test to compare outcomes between the different gestational age groups of VPT children. Finally the neonatal characteristics of children complete-

**Table 1.** Classification of deficiencies.<sup>(1)</sup>

| <b>Neuromotor deficiencies</b>                                       |                                                                                                                                                                                                                                                                                                         |
|----------------------------------------------------------------------|---------------------------------------------------------------------------------------------------------------------------------------------------------------------------------------------------------------------------------------------------------------------------------------------------------|
| Severe CP                                                            | CP unable to walk or walking only with aid at 8 or 5 years, or 2 years if no further follow-up                                                                                                                                                                                                          |
| Moderate CP                                                          | CP walking without aid at 8 or 5 years or 2 years if no further follow-up                                                                                                                                                                                                                               |
| No CP, other motor disorder                                          | No CP but MND2 at Touwen examination <sup>(2)</sup> at age 5<br>or dyspraxia or motor coordination trouble (ICD F82, R26, R27) at 8 or 5 years, or 2 years if no further follow-up                                                                                                                      |
| None identified                                                      | No CP and no motor disorder identified <sup>(3)</sup>                                                                                                                                                                                                                                                   |
| <b>Cognitive deficiencies/learning disabilities</b>                  |                                                                                                                                                                                                                                                                                                         |
| Severe                                                               | Mental retardation at 8 or 5 years (ICD F70–F79)<br>or special school/class <sup>(4)</sup> at 8 years with MPC at 5 years <70 <sup>(5)</sup><br>or no information at 8 years but MPC at 5 years <70<br>or mental retardation at 2 years, if no further follow-up                                        |
| Moderate                                                             | Moderate/mild cognitive deficiency mentioned in MDPH <sup>(6)</sup> questionnaire with no other details,<br>or if in a mainstream class at 8 but repeated one grade and/or receiving/needing special support at school <sup>(4)</sup><br>or no information at 8 years, MPC between 70 and 84 at 5 years |
| None identified                                                      | Mainstream class appropriate for age without any special support at 8 years<br>or if no information at 8 years, MPC ≥85 at 5 years<br>or if only medical examination at 2 or 5 years, no cognitive deficiency mentioned                                                                                 |
| <b>Association of motor and cognitive deficiencies<sup>(7)</sup></b> |                                                                                                                                                                                                                                                                                                         |
| Motor only                                                           | Severe or moderate CP or other motor disorder without cognitive deficiency/learning disability                                                                                                                                                                                                          |
| Cognitive only                                                       | Severe or moderate cognitive deficiency/learning disability without motor deficiency                                                                                                                                                                                                                    |
| Motor and cognitive                                                  | Motor deficiency and cognitive deficiency/learning disability associated                                                                                                                                                                                                                                |
| None                                                                 | No motor or cognitive deficiency identified                                                                                                                                                                                                                                                             |
| <b>Psychiatric disorder</b>                                          |                                                                                                                                                                                                                                                                                                         |
| Severe                                                               | Autism, pervasive development disorders (ICD F84) at 8 or 5 years                                                                                                                                                                                                                                       |
| Moderate                                                             | Hyperactivity or attention deficit disorder (ICD F90)<br>or conduct disorder (ICD F91) as reason for a visit to a psychiatrist or a psychologist at 5 or 8 years                                                                                                                                        |
| None identified                                                      | None of the above                                                                                                                                                                                                                                                                                       |
| <b>Epilepsy</b>                                                      |                                                                                                                                                                                                                                                                                                         |
|                                                                      | Reported at 8, 5 or 2 years (ICD G40)<br>or antiepileptic drug treatment reported at 8 or 5 years                                                                                                                                                                                                       |
| <b>Visual deficiency</b>                                             |                                                                                                                                                                                                                                                                                                         |
|                                                                      | Blindness (uni- or bilateral)<br>or Rossano test ≤2 in both eyes at 5 years                                                                                                                                                                                                                             |
| <b>Hearing deficiency</b>                                            |                                                                                                                                                                                                                                                                                                         |
|                                                                      | Deafness in one or both ears<br>or use of hearing aid at any age                                                                                                                                                                                                                                        |
| <b>Overall deficiencies</b>                                          |                                                                                                                                                                                                                                                                                                         |
| Severe                                                               | At least one of: severe CP, severe cognitive deficiency/learning disabilities,<br>severe psychiatric disorder, epilepsy, visual deficiency or hearing deficiency                                                                                                                                        |
| Moderate                                                             | At least one of: moderate CP, other motor disorder, moderate cognitive deficiency<br>or moderate psychiatric disorder                                                                                                                                                                                   |
| None identified                                                      | None of the above                                                                                                                                                                                                                                                                                       |

<sup>(1)</sup>For each deficiency, the classification follows a priority order according to severity at the most recent step of the follow-up available.

<sup>(2)</sup>Moderate Neuromotor Dysfunction (MND-2) at the short version of the Touwen neurological examination at the age of 5 years<sup>11</sup>.

<sup>(3)</sup>Including children free of CP or other neuromotor disorders but who were not assessed with the Touwen examination.

<sup>(4)</sup>Except for visual or hearing deficiency only; for 25 children in special school/class at 8 years of age with MPC at 5 years ≥70 or missing, other data in their record allowed us to classify 14 with a severe cognitive deficiency, 10 with moderate, and 1 with none identified record allowed to classify 14 as severe records.

<sup>(5)</sup>MPC = Mental Processing Composite of the K-ABC test<sup>14</sup>.

<sup>(6)</sup>MDPH = Maisons départementales des Personnes handicapées.

<sup>(7)</sup>Regardless of all other deficiencies.

doi:10.1371/journal.pone.0062683.t001

ly lost to follow-up were compared with those for whom we had at least one stage of follow-up. Statistical analyses were performed with SAS software (version 9.2).

## Results

Of the 2480 children born at 24–32 WG who survived to the age of 8 years, we obtained information at 2 years of age for 2055 (83%) (Table 2). At 5 years, 1897 (76%) children had a medical

examination, and 1594 (64%) were assessed with the K-ABC [14]. At age 8, we had a parental questionnaire or one completed by the MDPH or both for 1617 (65%) of the VPT children. Data obtained at any step of the follow-up provided information for 2220 (90%) of the eligible VPT children, but 170 children were followed only to the age of 2 years (Table 2). Overall, 10% of the children (n=260) were lost to follow-up. They did not differ significantly for cUS lesions from those with follow-up (19% in each group had a major or moderate neonatal cerebral lesion). Although they had a slightly higher gestational age at birth than those included in the study (9% of births <27 weeks compared to 12%), this difference was not significant. By contrast, their families belonged to less privileged social classes, 64% working in service and manual occupations, compared to 38% of those who continued to participate.

The VPT children had high rates of motor (14%) and cognitive (31%) deficiencies (Table 3). Rates of both deficiencies increased as gestational age decreased and reached 32% and 48% respectively at 24–26 WG. Only 6% of children had a motor deficiency with no cognitive problems, whereas 23% had a cognitive deficiency without a motor deficiency, and 8% had both. The rate of both combined reached 20% among extremely preterm children (24–26 WG). Moderate and severe psychiatric disorders, ie, autism, attention-deficit/hyperactivity, and conduct disorders, were observed in 6% and 0.5% of VPT children respectively. Two percent had epilepsy.

The risk of having at least one severe or moderate deficiency of any kind was 11 and 29%, respectively, and it decreased as gestational age increased: Only 36% of children born extremely preterm had no reported deficiency compared to 51% at 27–28 WG, 61% at 29–30 WG, and 66% at 31–32 WG. Rates of CP (6%) and other motor disorders (4%) were lower for the 170 children followed only to 2 years of age than among the 2050 children with a longer follow-up (10% and 6% respectively). Little information was available about the cognitive deficiencies and psychiatric status of those 170, understandably given their age (results not shown).

Rates of overall and severe deficiencies were high among children with major WMI: 71% and 42% respectively at 24–26 WG, 88% and 50% at 27–28 WG, and 80% and 53% at 29–

32 WG (Table 4). More than 40% had associated motor and cognitive deficiencies. However, 19 children with major WMI had no identified sequelae: 2 had a follow up at 2 years of age only, 7 at 5 years, and 10 through 8 years. In all 19, the major brain injury was located in only one area: frontal, occipital, parietal or other.

Inversely, isolated cognitive deficiency was much more frequent than either isolated motor deficiencies or the combination of motor and cognitive deficiencies among children with moderate or minor cerebral injury, as well as those with none (Table 4). The global risk of any deficiency remained high among extremely preterm children without major WMI (56%), but decreased as gestational age increased (Table 4). Finally, 101 VPT children without identified cerebral lesions developed severe deficiencies; all but one had had at least one cUS and 85% 2 or more. Most (57) had a severe cognitive deficiency, while 17 had severe CP.

## Discussion

This study shows a high rate of neurodisabilities in VPT children: even among those with no WMI on neonatal cUS, around 40% had at least one severe or moderate deficiency. The lower the gestational age, the higher the neurodisability rate. Cognitive deficiencies without motor disorders were more frequent than either combined motor and cognitive deficits or isolated motor deficiencies. Nonetheless, these combined deficiencies were frequent among extremely preterm children and those with major cUS WMI. Cognitive deficiencies without motor deficit were predominant among children with minor/moderate or no cUS brain injury and provide evidence of impaired brain development in these children.

The EPIPAGE study is the largest population-based study investigating the outcome of very preterm children born before 33 WG since the Bavarian study and the POPS study in the Netherlands in the mid-1980s [15,16]. Information collected from 2 to 8 years of age supplied neurodevelopmental status for 90% of the eligible VPT children; it was available for 80% at 2 years of age, 77% at 5 years, and 64% at 8 [6,10,12]. This follow up rate is close to those for other population-based studies (POPS, EPICure1) [16,17,18], especially in view of the large number of children included and the families' substantial geographical dispersion and mobility.

**Table 2.** Population study.

|                                               | 24–32 weeks    |            | 24–26 weeks    |            |
|-----------------------------------------------|----------------|------------|----------------|------------|
|                                               | Inclusion 1997 |            | Inclusion 1998 |            |
| Discharged alive                              | 2382           |            | 128            |            |
| Deaths between discharge and 8 years          | 27             |            | 3              |            |
| <b>Survivors at 8 years</b>                   | <b>2355</b>    |            | <b>125</b>     |            |
| Medical examination at 2 years                | 1949           | 83%        | 106            | 85%        |
| Medical examination at 5 years                | 1811           | 77%        | 86             | 69%        |
| with K-ABC test <sup>(2)</sup>                | 1533           | 65%        | 61             | 49%        |
| Parental questionnaire and/or MDPH at 8 years | 1531           | 65%        | 86             | 69%        |
| <b>Follow-up at least at one age</b>          | <b>2109</b>    | <b>90%</b> | <b>111</b>     | <b>89%</b> |
| only follow up at 2 years                     | 159            |            | 11             |            |
| Lost to follow up                             | 246            | 10%        | 14             | 11%        |
| Because of refusal to participate refusals    | 106            |            | 6              |            |

<sup>(1)</sup>All percentages calculated among survivors at 8 years.

<sup>(2)</sup>Kaufman Assessment Battery for Children <sup>14</sup>.

doi:10.1371/journal.pone.0062683.t002

**Table 3.** Deficiencies according to gestational age.

|                                                        | 24–32 weeks <sup>(1)</sup> |      | 24–26 weeks <sup>(2)</sup> |      | 27–28 weeks |      | 29–30 weeks |      | 31–32 weeks |      | p-value |
|--------------------------------------------------------|----------------------------|------|----------------------------|------|-------------|------|-------------|------|-------------|------|---------|
|                                                        | n = 2109                   | %    | n = 261                    | %    | n = 349     | %    | n = 556     | %    | n = 1054    | %    |         |
| <b>Neuromotor deficiencies</b>                         |                            |      |                            |      |             |      |             |      |             |      |         |
| Severe CP                                              | 66                         | 3.1  | 19                         | 7.3  | 16          | 4.6  | 19          | 3.4  | 21          | 2.0  | <0.001  |
| Moderate CP                                            | 124                        | 5.9  | 34                         | 13.0 | 31          | 8.9  | 28          | 5.0  | 45          | 4.3  |         |
| No CP, other motor disorder                            | 110                        | 5.2  | 31                         | 11.9 | 23          | 6.6  | 31          | 5.6  | 35          | 3.3  |         |
| None identified                                        | 1809                       | 85.8 | 177                        | 67.8 | 279         | 79.9 | 478         | 86.0 | 953         | 90.4 |         |
| <b>Cognitive deficiencies/learning disabilities</b>    |                            |      |                            |      |             |      |             |      |             |      |         |
| Severe                                                 | 137                        | 6.5  | 23                         | 8.8  | 36          | 10.3 | 36          | 6.5  | 52          | 4.9  | <0.001  |
| Moderate                                               | 518                        | 24.6 | 102                        | 39.1 | 103         | 29.5 | 120         | 21.6 | 237         | 22.5 |         |
| None identified                                        | 1454                       | 68.9 | 136                        | 52.1 | 210         | 60.2 | 400         | 71.9 | 765         | 72.6 |         |
| <b>Association of motor and cognitive deficiencies</b> |                            |      |                            |      |             |      |             |      |             |      |         |
| Motor only                                             | 138                        | 6.5  | 31                         | 11.9 | 22          | 6.3  | 47          | 8.5  | 51          | 4.8  | <0.001  |
| Cognitive only                                         | 493                        | 23.4 | 72                         | 27.6 | 91          | 26.1 | 125         | 22.5 | 239         | 22.7 |         |
| Motor and cognitive                                    | 162                        | 7.7  | 53                         | 20.3 | 48          | 13.8 | 31          | 5.6  | 50          | 4.7  |         |
| None                                                   | 1316                       | 62.4 | 105                        | 40.2 | 188         | 53.9 | 353         | 63.5 | 714         | 67.7 |         |
| <b>Psychiatric disorder</b>                            |                            |      |                            |      |             |      |             |      |             |      |         |
| Severe                                                 | 11                         | 0.5  | 1                          | 0.4  | 7           | 2.0  | 1           | 0.2  | 3           | 0.3  | <0.001  |
| Moderate                                               | 120                        | 5.7  | 23                         | 8.8  | 27          | 7.7  | 29          | 5.2  | 48          | 4.6  |         |
| None identified                                        | 1978                       | 93.8 | 237                        | 90.8 | 315         | 90.3 | 526         | 94.6 | 1003        | 95.2 |         |
| <b>Epilepsy</b>                                        |                            |      |                            |      |             |      |             |      |             |      |         |
| Yes                                                    | 45                         | 2.1  | 8                          | 3.1  | 10          | 2.9  | 10          | 1.8  | 20          | 1.9  | 0.47    |
| No                                                     | 2064                       | 97.9 | 253                        | 96.9 | 339         | 97.1 | 546         | 98.2 | 1034        | 98.1 |         |
| <b>Visual deficiency</b>                               |                            |      |                            |      |             |      |             |      |             |      |         |
| Yes                                                    | 19                         | 0.9  | 7                          | 2.7  | 3           | 0.9  | 2           | 0.4  | 10          | 0.9  | 0.019   |
| No                                                     | 2090                       | 99.1 | 254                        | 97.3 | 346         | 99.1 | 554         | 99.6 | 1044        | 99.1 |         |
| <b>Hearing deficiency</b>                              |                            |      |                            |      |             |      |             |      |             |      |         |
| Yes                                                    | 17                         | 0.8  | 7                          | 2.7  | 4           | 1.1  | 2           | 0.4  | 8           | 0.8  | 0.012   |
| No                                                     | 2092                       | 99.2 | 254                        | 97.3 | 345         | 98.9 | 554         | 99.6 | 1046        | 99.2 |         |
| <b>Overall deficiencies</b>                            |                            |      |                            |      |             |      |             |      |             |      |         |
| Severe                                                 | 230                        | 10.9 | 50                         | 19.2 | 59          | 16.9 | 60          | 10.8 | 86          | 8.2  | <0.001  |
| Moderate                                               | 616                        | 29.2 | 117                        | 44.8 | 112         | 32.1 | 155         | 27.9 | 277         | 26.3 |         |
| None identified                                        | 1263                       | 59.9 | 94                         | 36.0 | 178         | 51.0 | 341         | 61.3 | 691         | 65.6 |         |

<sup>(1)</sup>Inclusion 1997.<sup>(2)</sup>Inclusion 1997+1998.

doi:10.1371/journal.pone.0062683.t003

Children lost to follow-up had a slightly higher gestational age at birth than those included in our study, but no difference between the groups was observed for neonatal cerebral lesions. Accordingly, the impact of attrition on the CP rate should be low. However, 170 (7.7%) children were assessed only at 2 years of age, and assessment at an older age would probably have provided a more accurate measure of motor status: motor deficiencies were less frequent in this group than among children followed to the ages of 5 and 8 years. The small number of children assessed only at age 2 probably means that the risk of CP/motor deficits is underestimated only marginally.

Although cognitive deficiencies and psychiatric disorders were frequent among VPT children, methodological issues may nonetheless have induced underestimation: i) we could not assess the cognitive performance of the 170 children followed up only at 2 years; ii) loss to follow-up was more common in socially

disadvantaged children, a factor known to be associated with lower cognitive scores; iii) our definition did not consider some kinds of special care widely prescribed by the children's physicians, such as speech or psychomotor therapy. Therefore we have likely missed some learning difficulties not assessed with the Kaufmann Assessment Battery for Children [14], such as dyslexia, dyscalculia, or executive dysfunctions; iv) an 8-year follow-up is not enough to observe specific cognitive problems in VPT children. In 11-year-old extremely preterm children born in England in 1995, Johnson et al<sup>18</sup> observed that almost two thirds required additional support at school. The impact of impairments increases over time, as cognitive demands grow in parallel with progressively more complex academic studies in secondary school and exacerbate the children's difficulties.<sup>2</sup>

Eleven percent of all VPT children had at least one severe neurodisability and 29% a moderate one. Rates were inversely

**Table 4.** Deficiencies according to gestational age and neonatal cerebral lesions.

| LESIONS                                                | 24–26 weeks <sup>(1)</sup>               |                    |                 |                | 27–28 weeks <sup>(2)</sup>               |                    |                 |                 | 29–32 weeks <sup>(2)</sup>               |                     |                  |                  |    |      |     |      |    |      |     |      |     |      |      |      |
|--------------------------------------------------------|------------------------------------------|--------------------|-----------------|----------------|------------------------------------------|--------------------|-----------------|-----------------|------------------------------------------|---------------------|------------------|------------------|----|------|-----|------|----|------|-----|------|-----|------|------|------|
|                                                        | Neonatal cerebral lesions <sup>(3)</sup> |                    |                 |                | Neonatal cerebral lesions <sup>(3)</sup> |                    |                 |                 | Neonatal cerebral lesions <sup>(3)</sup> |                     |                  |                  |    |      |     |      |    |      |     |      |     |      |      |      |
|                                                        | Major<br>n = 24                          | Moderate<br>n = 72 | Minor<br>n = 68 | None<br>n = 96 | Major<br>n = 26                          | Moderate<br>n = 85 | Minor<br>n = 70 | None<br>n = 168 | Major<br>n = 47                          | Moderate<br>n = 183 | Minor<br>n = 220 | None<br>n = 1128 |    |      |     |      |    |      |     |      |     |      |      |      |
| <b>Neuromotor deficiencies</b>                         |                                          |                    |                 |                |                                          |                    |                 |                 |                                          |                     |                  |                  |    |      |     |      |    |      |     |      |     |      |      |      |
| Severe CP                                              | 7                                        | 29.2               | 5               | 6.9            | 2                                        | 2.9                | 5               | 5.2             | 7                                        | 26.9                | 4                | 4.7              | 3  | 4.3  | 2   | 1.2  | 20 | 42.6 | 7   | 3.8  | 2   | 0.9  | 10   | 0.9  |
| Moderate CP                                            | 5                                        | 20.8               | 9               | 12.5           | 11                                       | 16.2               | 9               | 9.4             | 8                                        | 30.8                | 10               | 11.8             | 4  | 5.7  | 9   | 5.4  | 9  | 19.1 | 17  | 9.3  | 13  | 5.9  | 34   | 3.0  |
| No CP, other motor disorder                            | 2                                        | 8.3                | 12              | 16.7           | 8                                        | 11.8               | 9               | 9.4             | 2                                        | 7.7                 | 7                | 8.2              | 2  | 2.9  | 12  | 7.1  | 4  | 8.5  | 11  | 6.0  | 15  | 6.8  | 36   | 3.2  |
| None identified                                        | 10                                       | 41.7               | 46              | 63.9           | 47                                       | 69.1               | 73              | 76              | 9                                        | 34.6                | 64               | 75.3             | 61 | 87.1 | 145 | 86.3 | 14 | 29.8 | 148 | 80.9 | 190 | 86.4 | 1048 | 92.9 |
| <b>Cognitive deficiencies/learning disabilities</b>    |                                          |                    |                 |                |                                          |                    |                 |                 |                                          |                     |                  |                  |    |      |     |      |    |      |     |      |     |      |      |      |
| Severe                                                 | 6                                        | 25.0               | 7               | 9.7            | 5                                        | 7.4                | 5               | 5.2             | 8                                        | 30.8                | 15               | 17.6             | 7  | 10.0 | 6   | 3.6  | 13 | 27.7 | 13  | 7.1  | 15  | 6.8  | 46   | 4.1  |
| Moderate                                               | 6                                        | 25.0               | 26              | 36.1           | 33                                       | 48.5               | 36              | 37.5            | 10                                       | 38.5                | 29               | 34.1             | 19 | 27.1 | 45  | 26.8 | 12 | 25.5 | 39  | 21.3 | 37  | 16.8 | 262  | 23.2 |
| None identified                                        | 12                                       | 50.0               | 39              | 54.2           | 30                                       | 44.1               | 55              | 57.3            | 8                                        | 30.8                | 41               | 48.2             | 44 | 62.9 | 117 | 69.6 | 22 | 46.8 | 131 | 71.6 | 168 | 76.4 | 820  | 72.7 |
| <b>Association of motor and cognitive deficiencies</b> |                                          |                    |                 |                |                                          |                    |                 |                 |                                          |                     |                  |                  |    |      |     |      |    |      |     |      |     |      |      |      |
| Motor only                                             | 4                                        | 16.7               | 13              | 18.1           | 5                                        | 7.4                | 9               | 9.4             | 4                                        | 15.4                | 6                | 7.1              | 3  | 4.3  | 9   | 5.4  | 13 | 27.7 | 21  | 11.5 | 20  | 9.1  | 43   | 3.8  |
| Cognitive only                                         | 2                                        | 8.3                | 20              | 27.8           | 22                                       | 32.4               | 27              | 28.1            | 5                                        | 19.2                | 29               | 34.1             | 20 | 28.6 | 37  | 22.0 | 5  | 10.6 | 38  | 20.8 | 42  | 19.1 | 271  | 24.0 |
| Motor and cognitive                                    | 10                                       | 41.7               | 13              | 18.1           | 16                                       | 23.5               | 14              | 14.6            | 13                                       | 50.0                | 15               | 17.6             | 6  | 8.6  | 14  | 8.3  | 20 | 42.6 | 14  | 7.7  | 10  | 4.5  | 37   | 3.3  |
| None                                                   | 8                                        | 33.3               | 26              | 36.1           | 25                                       | 36.8               | 46              | 47.9            | 4                                        | 15.4                | 35               | 41.2             | 41 | 58.6 | 108 | 64.3 | 9  | 19.1 | 110 | 60.1 | 148 | 67.3 | 777  | 68.9 |
| <b>Psychiatric disorder</b>                            |                                          |                    |                 |                |                                          |                    |                 |                 |                                          |                     |                  |                  |    |      |     |      |    |      |     |      |     |      |      |      |
| Severe                                                 | 0                                        | 0                  | 0               | 0              | 0                                        | 0                  | 1               | 1.0             | 1                                        | 3.8                 | 3                | 3.5              | 2  | 2.9  | 1   | 0.6  | 1  | 2.1  | 0   | 0    | 1   | 0.5  | 2    | 0.2  |
| Moderate                                               | 2                                        | 8.3                | 3               | 4.2            | 9                                        | 13.2               | 9               | 9.4             | 2                                        | 7.7                 | 9                | 10.6             | 8  | 11.4 | 8   | 4.8  | 3  | 6.4  | 6   | 3.3  | 13  | 5.9  | 54   | 4.8  |
| None identified                                        | 22                                       | 91.7               | 69              | 95.8           | 59                                       | 86.8               | 86              | 89.6            | 23                                       | 88.5                | 73               | 85.9             | 60 | 85.7 | 159 | 94.6 | 43 | 91.5 | 177 | 96.7 | 206 | 93.6 | 1072 | 95   |
| <b>Epilepsy</b>                                        |                                          |                    |                 |                |                                          |                    |                 |                 |                                          |                     |                  |                  |    |      |     |      |    |      |     |      |     |      |      |      |
| Yes                                                    | 1                                        | 4.2                | 2               | 2.8            | 1                                        | 1.5                | 4               | 4.2             | 4                                        | 15.4                | 1                | 1.2              | 3  | 4.3  | 2   | 1.2  | 9  | 19.1 | 6   | 3.3  | 5   | 2.3  | 9    | 0.8  |
| No                                                     | 23                                       | 95.8               | 70              | 97.2           | 67                                       | 98.5               | 92              | 95.8            | 22                                       | 84.6                | 84               | 98.8             | 67 | 95.7 | 166 | 98.8 | 38 | 80.9 | 177 | 96.7 | 215 | 97.7 | 1119 | 99.2 |
| <b>Visual deficiency</b>                               |                                          |                    |                 |                |                                          |                    |                 |                 |                                          |                     |                  |                  |    |      |     |      |    |      |     |      |     |      |      |      |
| Yes                                                    | 1                                        | 4.2                | 1               | 1.4            | 3                                        | 4.4                | 2               | 2.1             | 0                                        | 0                   | 1                | 1.2              | 1  | 1.4  | 1   | 0.6  | 4  | 8.5  | 1   | 0.5  | 2   | 0.9  | 5    | 0.4  |
| No                                                     | 23                                       | 95.8               | 71              | 98.6           | 65                                       | 95.6               | 94              | 97.9            | 26                                       | 100                 | 84               | 98.8             | 69 | 98.6 | 167 | 99.4 | 43 | 91.5 | 182 | 99.5 | 218 | 99.1 | 1123 | 99.6 |
| <b>Hearing deficiency</b>                              |                                          |                    |                 |                |                                          |                    |                 |                 |                                          |                     |                  |                  |    |      |     |      |    |      |     |      |     |      |      |      |



throughout life is influenced by social environment and socioeconomic status [12,27].

This study also confirms that severe (autism spectrum disorders) and moderate psychiatric disorders (attention deficit/hyperactivity and behavioral disorders) as well as epilepsy are more frequent than in the general population and are inversely correlated with gestational age at birth [28,29]. Late-migrating GABAergic neurons are a transient neuronal population in the subcortical white matter of the preterm infant, and the decrease in GABAergic neurons (which mediate inhibition of action potential in adults) documented in the central white matter of preterm children with PVL suggests an inhibitory deficit in infancy [9]. However, the lack of an obvious association between psychiatric disorders and neonatal brain injuries once again implies impaired brain development and connectivity in the preterm population. In autism, diffusion tensor imaging tractography has shown differences in the anatomy of frontostriatal white matter tracts in autism, and fMRI [30,31] has shown underconnectivity.

In conclusion, we showed here that infants born VPT are at high risk of developing cognitive and motor impairments, a risk inversely correlated with gestational age. The strong association between motor impairments and later cognitive dysfunction supports the hypotheses of a common origin of these difficulties and/or the influence of motor development on subsequent cognitive skills. Improvement in our ability to protect the developing brain is urgently needed as we have no definitive strategy for preventing the long-term neurological consequences that can occur in these infants. Only one compound, low-dose magnesium sulphate given to women at risk of preterm birth, has demonstrated some beneficial effects in the prevention of cerebral palsy in preterm humans [32]. Neonatal developmental care and

post-discharge interventions in VPT children must be evaluated over the long term to determine those most effective in improving cognitive and motor development.

## Acknowledgments

We thank all the parents and children who have participated in this study over the years. We acknowledge Jo Ann Cahn for help in editing the manuscript and all the members of EPIPAGE group. INSERM U149: B Larroque (national coordinator), PY Ancel, B Blondel, G Bréart, M Dehan, M Garel, M Kaminski, F Maillard, C du Mazaubrun, P Missy, F Schili, K Supernant, L. Marchand. Alsace: M Durand, J Matis, J Messer, A Treisser (Hôpital de Haute-pierre, Strasbourg). Franche-Comté: A Burguet, L Abraham-Lerat, A Menget, P Roth, J-P Schaal, F Thiriez (CHU St Jacques, Besançon), Haute-Normandie: C Lévêque, S Marret, L Marpeau (Hôpital Charles Nicolle, Rouen). Languedoc-Roussillon: P Boulot, G Cambonie J-C Picaud (Hôpital Arnaud de Villeneuve, Montpellier), A-M Donadio, B Ledésert (ORS Montpellier). Lorraine: M André, J Fresson, JM Hascoët (Maternité Régionale, Nancy). Midi-Pyrénées: C Arnaud, H Grandjean (INSERM U558, Toulouse), M Rolland (Hôpital des Enfants, Toulouse). Nord-Pas-de-Calais: A Fily, A Ego, ML Outtier, V Pierrat, D Subtil, P Truffert (Hôpital Jeanne de Flandre, Lille). Pays-de-Loire: G Boog, V Rouger-Bureau, J-C Rozé (Hôpital Mère-Enfant, Nantes). Paris-Petite-Couronne: PY Ancel, G Bréart, M Kaminski, C du Mazaubrun (INSERM U149, Paris), M Dehan, V Zupan-Simunek (Hôpital Antoine Bécclère, Clamart), M Vodovar, M Voyer (Institut de Puériculture, Paris).

## Author Contributions

Critical revision of the manuscript for important intellectual content: SM LM JCP JMH CA JCR PT BL MK PYA. Statistical analysis: LM. Performed the experiments: SM LM JCP JMH CA PT JCR BL MK PYA. Analyzed the data: SM LM JCP JMH CA PT JCR BL MK PYA. Wrote the paper: SM LM MK PYA.

## References

- SCPE (2000) Surveillance of Cerebral Palsy in Europe : a collaboration of cerebral palsy surveys and registers. *Dev Med Child Neurol* 42: 816–824. Available: <http://onlinelibrary.wiley.com/doi/10.1111/j.1469-8749.2000.tb00695.x/pdf>. Accessed 2013 Apr 10.
- Saigal S, Doyle LW (2008) An overview of mortality and sequelae of preterm birth from infancy to adulthood. *Lancet* 371: 261–269.
- Himmelman K, Hagberg G, Uvebrant P (2010) The changing panorama of cerebral palsy in Sweden. X. Prevalence and origin in the birth-year period 1999–2002. *Acta Paediatr* 99: 1337–1343.
- van Haastert IC, Groenendaal FG, Uiterwaal CSPM, Termote JUM, van der Heide-Jalving M, et al. (2011) Decreasing incidence and severity of cerebral palsy in prematurely born children. *J Pediatr* 159: 86–91.
- Bhutta AT, Cleves MA, Casey PH, Cradock MM, Anand KJ (2002) Cognitive and behavioral outcomes of school-aged children who were born preterm: a meta-analysis. *JAMA* 288: 728–737.
- Larroque B, Ancel PY, Marret S, Marchand L, Andre M, et al. (2008) Neurodevelopmental disabilities and special care of 5-year-old children born before 33 weeks of gestation (the EPIPAGE study): a longitudinal cohort study. *Lancet* 371: 813–820.
- de Vries LS, van Haastert IL, Rademaker KJ, Koopman C, Groenendaal F (2004) Ultrasound abnormalities preceding cerebral palsy in high-risk preterm infants. *J Pediatr* 144: 815–820.
- Kuban KC, Allred EN, O'Shea TM, Paneth N, Pagano M, et al. (2009) Cranial ultrasound lesions in the NICU predict cerebral palsy at age 2 years in children born at extremely low gestational age. *J Child Neurol* 24: 63–72.
- Volpe JJ (2009) Brain injury in premature infants: a complex amalgam of destructive and developmental disturbances. *Lancet Neurol* 8: 110–124.
- Ancel PY, Livinec F, Larroque B, Marret S, Arnaud C, et al. (2006) Cerebral palsy among very preterm children in relation to gestational age and neonatal ultrasound abnormalities: the EPIPAGE cohort study. *Pediatrics* 117: 828–835.
- Arnaud C, Daubisse-Marliac L, White-Koning M, Pierrat V, Larroque B, et al. (2007) Prevalence and associated factors of minor neuromotor dysfunctions at age 5 years in prematurely born children: the EPIPAGE Study. *Arch Pediatr Adolesc Med* 161: 1053–1061.
- Larroque B, Ancel PY, Marchand-Martin L, Cambonie G, Fresson J, et al. (2011) Special care and school difficulties in 8-year-old very preterm children: the EPIPAGE cohort study. *PLoS One* 6: e21361.
- Larroque B, Marret S, Ancel PY, Arnaud C, Marpeau L, et al. (2003) White matter damage and intraventricular hemorrhage in very preterm infants: the EPIPAGE study. *J Pediatr* 143: 477–483.
- Kaufmann A, Kaufmann N (1983) Kaufmann assessment battery for children. Circles Pines, MN: American Guidance Service.
- Wolke D, Meyer R (1999) Cognitive status, language attainment, and prereading skills of 6-year-old very preterm children and their peers: the Bavarian Longitudinal Study. *Dev Med Child Neurol* 41: 94–109.
- Weisglas-Kuperus N, Hille ET, Duivenvoorden HJ, Finken MJ, Wit JM, et al. (2009) Intelligence of very preterm or very low birthweight infants in young adulthood. *Arch Dis Child Fetal Neonatal Ed* 94: F196–200.
- Marlow N, Wolke D, Bracewell MA, Samara M (2005) Neurologic and developmental disability at six years of age after extremely preterm birth. *N Engl J Med* 352: 9–19.
- Johnson S, Hennessy E, Smith R, Trikick R, Wolke D, et al. (2009) Academic attainment and special educational needs in extremely preterm children at 11 years of age: the EPICure study. *Arch Dis Child Fetal Neonatal Ed* 94: F283–289.
- Moore T, Hennessy EM, Myles J, Johnson SJ, Draper ES, et al. (2012) Neurological and developmental outcome in extremely preterm children born in England in 1995 and 2006: the EPICure studies. *Br Med J* 345: e7961.
- Beiano G, Khoshnood B, Kaminski M, Pierrat V, Marret S, et al. (2010) Cerebral Lesions and other Prognostic Factors for Cerebral Palsy in Very Preterm Infants. The EPIPAGE Prospective Cohort Study. *Dev Med Child Neurol* 52: e119–25.
- Beiano G, Khoshnood B, Kaminski M, Marret S, Pierrat V, et al. (2011) Predictors of the risk of cognitive deficiency in very preterm infants: the EPIPAGE prospective cohort. *Acta Paediatr* 100: 370–378.
- Smyser CD, Inder TE, Shimony JS, Hill JE, Degan AJ, et al. (2010) Longitudinal analysis of neural network development in preterm infants. *Cereb Cortex* 20: 2852–2862.
- Ball G, Boardman JP, Rueckert D, Aljabar P, Arichi T, et al. (2012) The effect of preterm birth on thalamic and cortical development. *Cereb Cortex* 22: 1016–1024.
- Peterson BS, Vohr B, Kane MJ, Whalen DH, Schneider KC, et al. (2002) A functional magnetic resonance imaging study of language processing and its cognitive correlates in prematurely born children. *Pediatrics* 110: 1153–1162.
- Gozzo Y, Vohr B, Lacadie C, Hampson M, Katz KH, et al. (2009) Alterations in neural connectivity in preterm children at school age. *Neuroimage* 48: 458–463.
- Foix-Hélias L, Marret S, Ancel PY, Marchand L, Arnaud C, et al. (2008) Impact of the use of antenatal corticosteroids on mortality, cerebral lesions and five-year neuro-developmental outcomes of very preterm infants: the EPIPAGE Cohort study. *Br J Obstet Gynaecol* 115: 275–282.



27. Blakemore SJ (2010) The developing social brain: Implications for education. *Neuron* 65: 744–747.
28. Johnson S, Marlow N (2011) Preterm birth and childhood psychiatric disorders. *Pediatr Res* 69: 11–18.
29. Moster D, Lie RT, Markesad T (2008) Long-term medical and social consequences of preterm birth. *N Engl J Med* 359: 262–273.
30. Langen M, Leemans A, Johnston P, Ecker C, Daly E, et al. (2012) Fronto-striatal circuitry and inhibitory control in autism: Findings from diffusion tensor imaging tractography. *Cereb Cortex* 48: 183–193.
31. Schipul SE, Williams DL, Keller TA, Minshew NJ, Just MA (2012) Distinctive neural processes during learning in autism. *Cereb Cortex* 22: 937–950.
32. Doyle LW, Crowther CA, Middleton P, Marret S (2009) Antenatal magnesium sulphate and neurologic outcome in preterm infants. *Obstet Gynecol* 113: 1327–1333.
